# Supplementary material for: Application of fuzzy c -means clustering for analysis of chemical ionization mass spectra: insights into the gas phase chemistry of NO 3 -initiated oxidation of isoprene
Source: Copernicus journal article supplement (doi:10.5194/amt-17-1811-2024), 2024-03-28
Supplement: Supplementary file 1 [file amt-17-1811-2024-supplement.pdf]

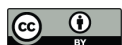

*Supplement of*

## **Application of fuzzy *c*-means clustering for analysis of chemical ionization mass spectra: insights into the gas phase chemistry of NO<sub>3</sub>-initiated oxidation of isoprene**

**Rongrong Wu et al.**

*Correspondence to:* Thomas F. Mentel (t.mentel@fz-juelich.de)

The copyright of individual parts of the supplement might differ from the article licence.

## S1 Fuzzy clustering validity indices

Six fuzzy validity indices were used to determine the appropriate number of clusters, include Sum of within-cluster variance ( $V_{SWCV}$ ), Fukuyama-Sugeno index ( $V_{FS}$ , Fukuyama, 1989), Xie-Beni index ( $V_{XB}$ , Xie and Beni, 1991), Kwon index ( $V_{Kwon}$ , Kwon, 1998), Bouguessa-Wang-Sun index ( $V_{BWS}$ , Bouguessa et al., 2006), and Fuzzy Silhouette ( $FS$ , Campello and Hruschka, 2006). Their definitions and notes for applications are described in this section.

**(1) Sum of within-cluster variation ( $V_{SWCV}$ ).** The basic idea of clustering is to sort clusters so that the sum of within-cluster variation is minimized, and this is used as the objective function  $J_m(U, V)$  in fuzzy  $c$ -means clustering, as given by Eq. S1. The sum of within-cluster squared distance measures the compactness of clustering, and the “elbow” point of the curve of  $V_{SWCV}$  as a function of numbers of clusters is generally considered as an indicator of the optimal number of clusters (Campello and Hruschka, 2006).

$$V_{SWCV} = \sum_{i=1}^c \sum_{j=1}^n u_{ij}^m d(x_j, v_i)^2 \quad (S1)$$

where  $x_j$  and  $v_i$  denote the  $j^{th}$  object in the dataset and the  $i^{th}$  cluster center, respectively,  $m$  is the fuzzifier,  $u_{ij}$  is the membership degree of  $x_j$  to the  $i^{th}$  cluster, and  $d(x_j, v_i)$  represents the distance between the object  $x_j$  and the  $i^{th}$  cluster center  $v_i$ .

The elbow point is where the  $V_{SWCV}$  stops to drop as rapidly as before, namely the point of maximum curvature. In this study, the KneedLocator function of Kneed package in Python was used to find the elbow point.

**(2) Fukuyama-Sugeno index ( $V_{FS}$ ).** The Fukuyama-Sugeno index combines the membership degree and the geometrical property of the dataset to evaluate a partition (Bouguessa and Wang, 2004). It evaluates the quality of a clustering solution by measuring the discrepancy between compactness and separation of clusters, as formulated by Eq. S2. Obviously, smaller  $V_{FS}$  indicates better performance of clustering.

$$V_{FS} = Compact(c) - Separate_{sum}(c) \quad (S2)$$

where the compactness is defined by the sum of within-cluster squared distance, as given by Eq. S3:

$$Compact(c) = \sum_{i=1}^c \sum_{j=1}^n u_{ij}^m d(x_j, v_i)^2 \quad (S3)$$

where  $x_j$  and  $v_i$  denote the  $j^{th}$  object in the dataset and the  $i^{th}$  cluster center, respectively,  $m$  is the fuzzifier,  $u_{ij}$  is the membership degree of  $x_j$  to the  $i^{th}$  cluster, and  $d(x_j, v_i)$  represents the distance between the object  $x_j$  and the  $i^{th}$  cluster center  $v_i$ .

And the separation of partition is measured by the sum of squared distances between each cluster center and the mean of all cluster centers, as given by Eq. S4:

$$Separate_{sum}(c) = \sum_{i=1}^c (\sum_{j=1}^n u_{ij}^m) d(v_i, \bar{v})^2 \quad (S4)$$

where  $\bar{v} = \frac{1}{c} \sum_{i=1}^c v_i$ , and  $d(v_i, \bar{v})$  represents the distance between the  $i^{th}$  cluster center  $v_i$  and the mean of all cluster centers  $\bar{v}$ .

**(3) Xie-Beni index ( $V_{XB}$ ).** Xie-Beni index is a popular fuzzy clustering validity measure proposed by Xie and Beni (1991). It is defined as the ratio of compactness and separation as shown in Eq. S5, where the sum of within-cluster squared distance divided by the total number of objects in the numerator, represents the compactness of the partition, and the minimum squared distance of cluster centers in the denominator represents the separation. The smaller the numerator, the more compact the clusters are, whereas the larger the denominator, the more dispersed the clusters are from each other. As a consequence, the smaller  $V_{XB}$ , the better the partition.

$$V_{XB} = \frac{\frac{1}{n} Compact(c)}{Separate_{min}(c)} \quad (S5)$$

where  $n$  is the total number of objects in the data set, the compactness of the partition,  $Compact(c)$ , is defined by the sum of within-cluster squared distance, as given by Eq. S3, and the separation of partition,  $Separate_{min}(c)$ , is measured by the minimum squared distance between cluster centers, as calculated by Eq. S6:

$$Separate_{min}(c) = \min_{k \neq i} d(v_k, v_i)^2 \quad (S6)$$

where  $d(v_k, v_i)$  is the distance between the  $k^{th}$  cluster center  $v_k$  and the  $i^{th}$  cluster center  $v_i$  ( $k \neq i$ ).

**(4) Kwon index ( $V_{kwon}$ ).** When  $c$  approaches  $n$ , the value of  $V_{XB}$  decreases monotonically to 0 and will lose robustness in determining the optimal number of clusters. To overcome this drawback, Kwon (1998) revised  $V_{XB}$  and proposed the Kwon index, as defined in Eq. S7. The second item in the numerator is a penalty function, which represents the average squared

distance of cluster centers to the overall mean of the data set and can eliminate its monotonous decreasing tendency when the number of clusters is close to  $n$ . Similar to  $V_{XB}$ , the smaller  $V_{kwon}$ , the better the clustering quality.

$$V_{Kwon} = \frac{Compact(c) + Penalty(c)}{Separate_{min}(c)} \quad (S7)$$

where  $Compact(c)$  and  $Separate_{min}(c)$  represent the compactness and separation of the partition, which are calculated by Eq. S3 and Eq. S6, respectively, and  $Penalty(c)$  is a penalty function defined by Eq. S8:

$$Penalty(c) = (1/c) \sum_{i=1}^c d(v_i, \bar{x})^2 \quad (S8)$$

where  $\bar{x}$  denotes the overall mean of the data set, that is  $\bar{x} = \frac{1}{n} \sum_{j=1}^n x_j$ , and  $d(v_i, \bar{x})$  is the distance between the  $i^{\text{th}}$  cluster center  $v_i$  and  $\bar{x}$ .

**(5) Bouguessa-Wang-Sun index ( $V_{BWS}$ ).** To better deal with overlapped clusters that differ in geometric shape, Bouguessa et al. (2006) proposed a new validity index, as formulated in Eq. S9, and hereafter called Bouguessa-Wang-Sun index in this study. Similar to  $V_{XB}$  and  $V_{Kwon}$ ,  $V_{BWS}$  is also based on the concept of using the ratio of separation and compactness, but the definitions for compactness and separation are modified. By making use of the fuzzy covariance matrix as a measure of compactness,  $V_{BWS}$  takes the variations of cluster shape, density and orientation into account and was proved to perform well for heavily overlapping clusters (Bouguessa and Wang, 2004; Bouguessa et al., 2006). According to its definition, a larger value of  $V_{BWS}$  indicates a better fuzzy partition.

$$V_{BWS} = \frac{Sep(c)}{Comp(c)} \quad (S9)$$

In the equation,  $Sep(c)$  represents fuzzy separation, as defined in Eq. S10, and  $\mathbf{S}_B$  is the between-cluster fuzzy matrix given by Eq. S11. The larger  $Sep(c)$ , the better separation between clusters.

$$Sep(c) = trace(\mathbf{S}_B) \quad (S10)$$

$$\mathbf{S}_B = \sum_{i=1}^c \sum_{j=1}^n u_{ij}^m (v_i - \bar{v})(v_j - \bar{v})^T \quad (S11)$$

$Comp(c)$  in Eq. S9 represents the overall compactness of fuzzy clustering, as given by Eq. S12. The smaller  $Comp(c)$ , the more compact within each cluster.

$$Comp(c) = \sum_{i=1}^c trace(\Sigma_i) \quad (S12)$$

where  $\Sigma_i$  is the fuzzy covariance matrix as defined by:

$$\Sigma_i = \frac{\sum_{j=1}^n u_{ij}^m (x_j - v_i)(x_j - v_i)^T}{\sum_{j=1}^n u_{ij}^m} \quad (S13)$$

**(6) Fuzzy Silhouette (FS).** The silhouette score ( $s_j$ , as defined in Eq. S14) was first proposed by Rousseeuw (1987) and can be used to measure how close an object is to the cluster center it belongs compared to other clusters. The average silhouette score of all objects,  $CS$ , as given by Eq. S15, are frequently used to assess the quality of clustering solutions. The silhouette score was originally adopted to evaluate hard or non-fuzzy clustering solutions and did not consider the fuzzy partition matrix in the calculation. Consequently,  $CS$  might be inadequate to discriminate fuzzy clusters since it ignores the information contained in the fuzzy partition matrix which reveal the overlap degrees of clusters.

$$s_j = \frac{b_j - a_j}{\max\{a_j, b_j\}} \quad (S14)$$

$$CS = \frac{1}{n} \sum_{j=1}^n s_j \quad (S15)$$

where  $a_j$  is the average distance of object  $x_j$  (belonging to cluster  $p$ ) to all other objects in the same cluster. Let  $d_j$  be the average distance of object  $x_j$  to all objects belonging to another cluster  $r$  ( $r \neq i$ ), then  $b_j$  is the minimum of  $d_j$ , which represents the average distance of object  $j$  to its closet neighboring cluster.

To extend the silhouette score to fuzzy partition and make explicit use of the fuzzy partition matrix, Campello and Hruschka (2006) proposed *Fuzzy Silhouette (FS)*, as given by Eq. S16. Instead of weighing each individual silhouette equally, *FS* stresses the importance of objects lying in the vicinity of cluster centers while reducing the importance of objects located in the boundary region (whose membership degrees to different clusters are similar or identical).

$$FS = \frac{\sum_{j=1}^n (u_{pj} - u_{qj})^\alpha s_j}{\sum_{j=1}^n (u_{pj} - u_{qj})^\alpha} \quad (S16)$$

where  $s_j$  in the average silhouette score of object  $x_j$ ,  $u_{pj}$  and  $u_{qj}$  are the first and second largest coefficient of  $x_j$  in the fuzzy partition matrix, respectively, and  $\alpha$  is a weight coefficient and set to be 1 as default in this study (Campello and Hruschka, 2006).

In a hard partition, each object is exclusively partitioned to one cluster, and it is easier to determine the intra- (within-cluster) and inter- (between-cluster) distances. With regard to a fuzzy partition, however, an object could belong to multiple clusters simultaneously, and its affiliation to each cluster is measured by the membership degree. In order to determine the intra- and inter-distance of an object in a fuzzy partition, the original definition of silhouette is reformed by introducing a concept of intra-inter scores. The intra-score matrix is defined by

$$IntraDist_i = [intra_i(d_{jk})], \quad 1 \leq j \neq k \leq n, 1 \leq i \leq c \quad (S17)$$

where  $intra_i(d_{jk}) = (u_{ij} \wedge u_{ik})$ .

And the inter-score matrix is given by

$$InterDist_{ir} = [inter_{ir}(d_{jk})], \quad 1 \leq j \neq k \leq n, 1 \leq i < r \leq c \quad (S18)$$

where  $inter_{ir}(d_{jk}) = (u_{ij} \wedge u_{rk}) \vee (u_{rj} \wedge u_{ik})$ .

$u_{ij}$  and  $u_{ik}$  are the membership degree of object  $x_j$  and  $x_k$  to cluster  $i$ , and  $u_{rj}$  and  $u_{rk}$  are the membership degree of object  $x_j$  and  $x_k$  to cluster  $r$ , respectively.

With the intra- and inter-distance scores defined above, we can calculate the intra-distance  $a_j$  and inter-distance  $b_j$  follow the equations proposed by Rawashdeh and Ralescu (2012), as shown by Eq. S19 and Eq. S20, respectively:

$$a_j = \min \left\{ \frac{\sum_{k=1}^n IntraDist_i(j,k)d(x_j,x_k)}{\sum_{k=1}^n IntraDist_i(j,k)} \right\}, \quad 1 \leq j \neq k \leq n, 1 \leq i \leq c \quad (S19)$$

$$b_j = \min \left\{ \frac{\sum_{k=1}^n InterDist_{ir}(j,k)d(x_j,x_k)}{\sum_{k=1}^n InterDist_{ir}(j,k)} \right\}, \quad 1 \leq j \neq k \leq n, 1 \leq i < r \leq c \quad (S20)$$

where  $IntraDist_i(j,k)$  and  $InterDist_{ir}(j,k)$  are the intra-, and inter-distance score of the object  $x_j$ , respectively, as defined in Eq. S17 and Eq. S18, and  $d(x_j, x_k)$  represents the distance between the object  $x_j$  and  $x_k$ .

The silhouette score falls in the range from -1 to +1, with a value approaching +1 indicating that the object is correctly assigned, whereas with a value close to -1 indicating that the object is misclustered (better to sort it to a neighboring cluster than to current cluster). An  $s_j$  close to 0 implies that the object lies in the boundary region (between clusters) and thus it is unclear to which cluster it belongs. The average cluster silhouette score can tell if the cluster is appropriately configured or not. The larger the average cluster silhouette score, the clearer the cluster. The overall average silhouette score of all objects in the dataset can be used as a measure of clustering quality. Further, it can be used to find the appropriate number of clusters. When

plotting the overall silhouette score as a function of cluster number, the maximum point of the curve indicates the optimal value of  $c$ , where the clustering solution has a minimum intra-cluster distance ( $a_j$ ) and a maximum inter-cluster distance ( $b_j$ ).







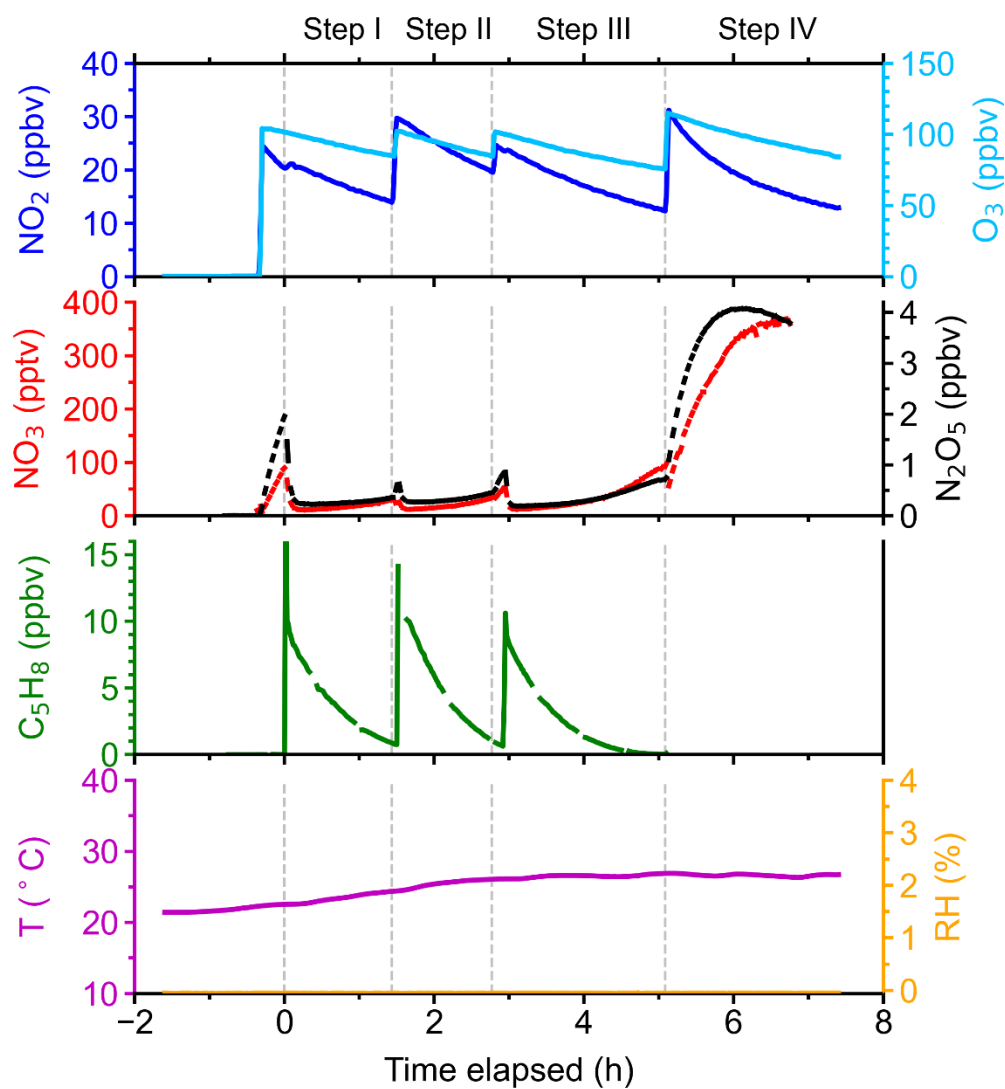

**Figure S1.** Concentrations of trace gases ( $\text{NO}_x$ ,  $\text{NO}_y$ , and isoprene) and conditions of the chamber experiment selected for FCM analysis in this study. Adapted from Wu et al. (2021).

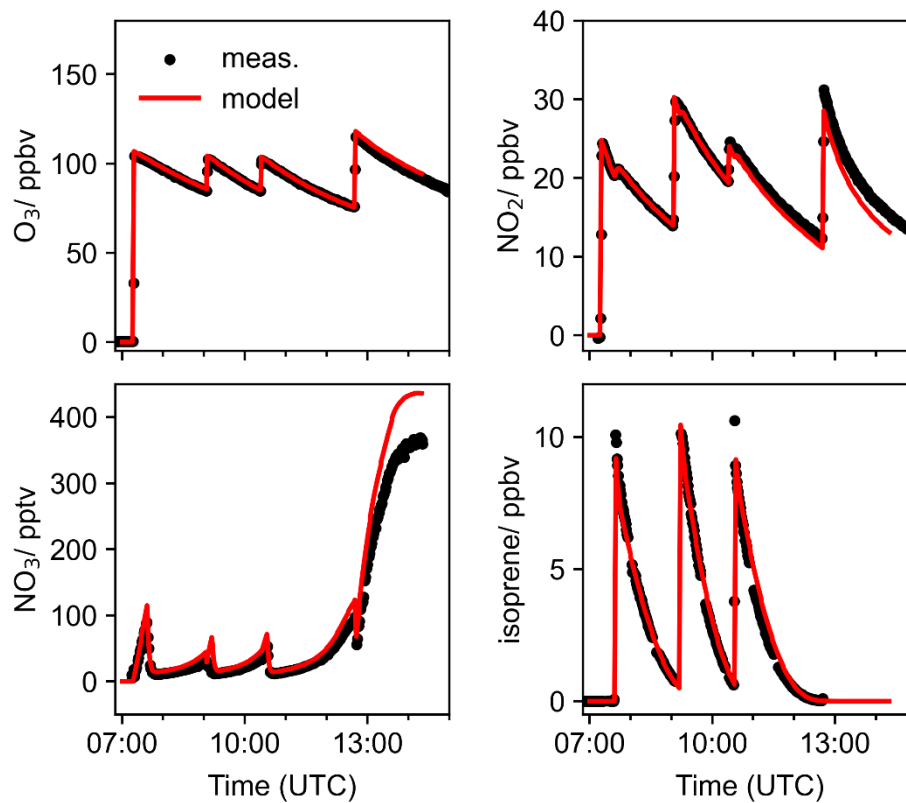

**Figure S2.** Measured and simulated concentrations of O<sub>3</sub>, NO<sub>2</sub>, NO<sub>3</sub>, and isoprene in the chamber experiment of isoprene oxidation by NO<sub>3</sub>. Simulation results are from a box model with using the gas-phase chemistry mechanism of isoprene + NO<sub>3</sub> from MCM v3.3.1.

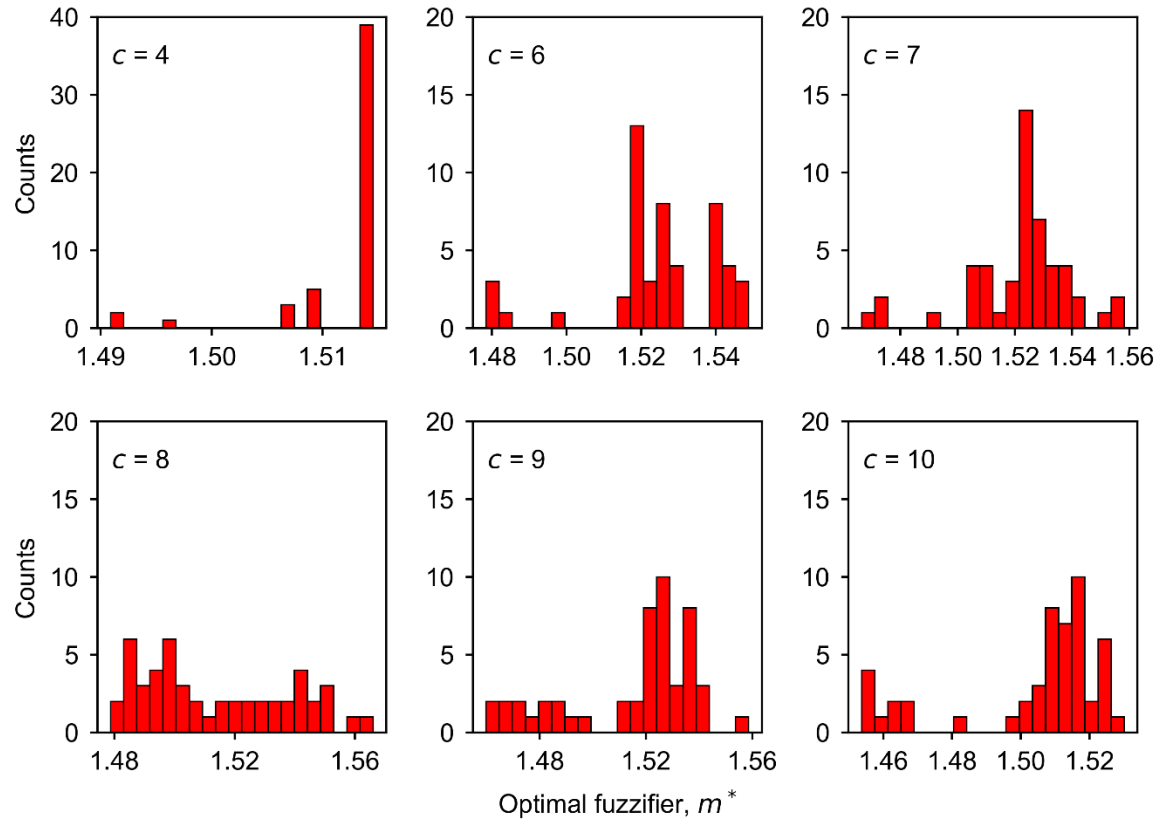

**Figure S3.** Distribution of the optimal value of fuzzifier ( $m^*$ ) obtained from 50 repetitions.

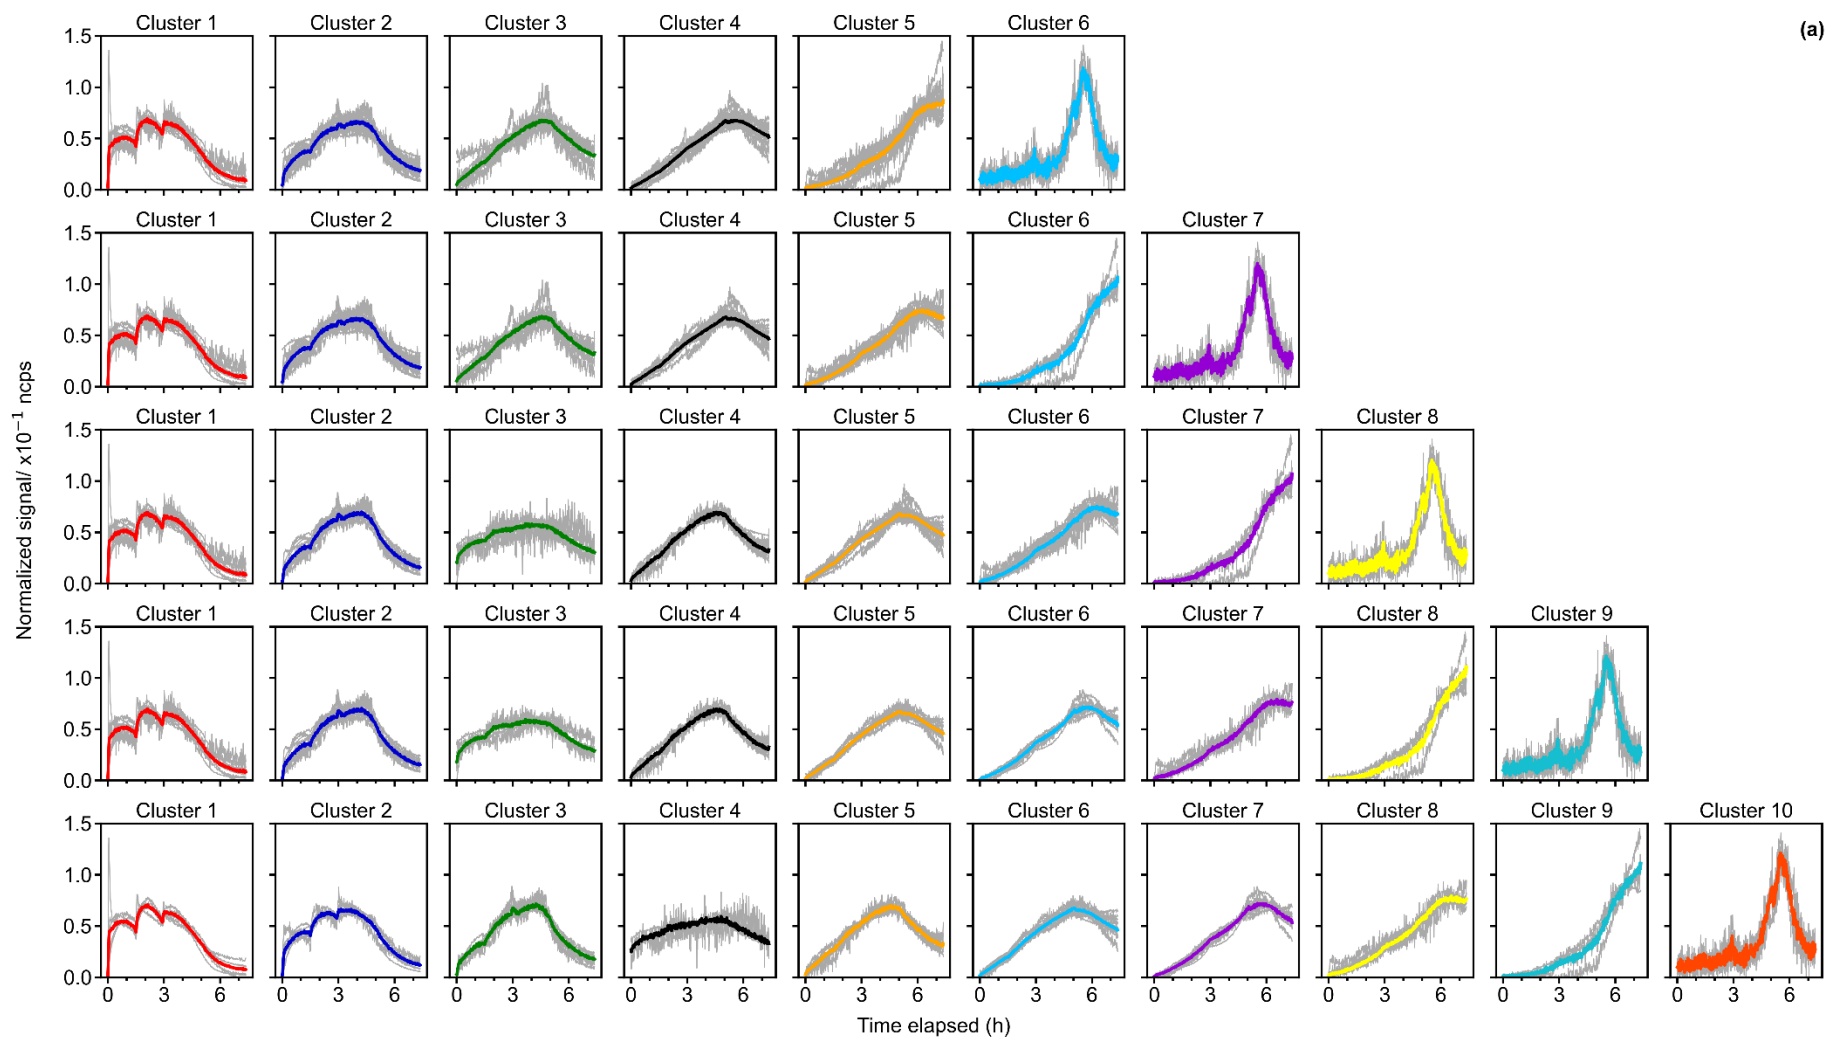

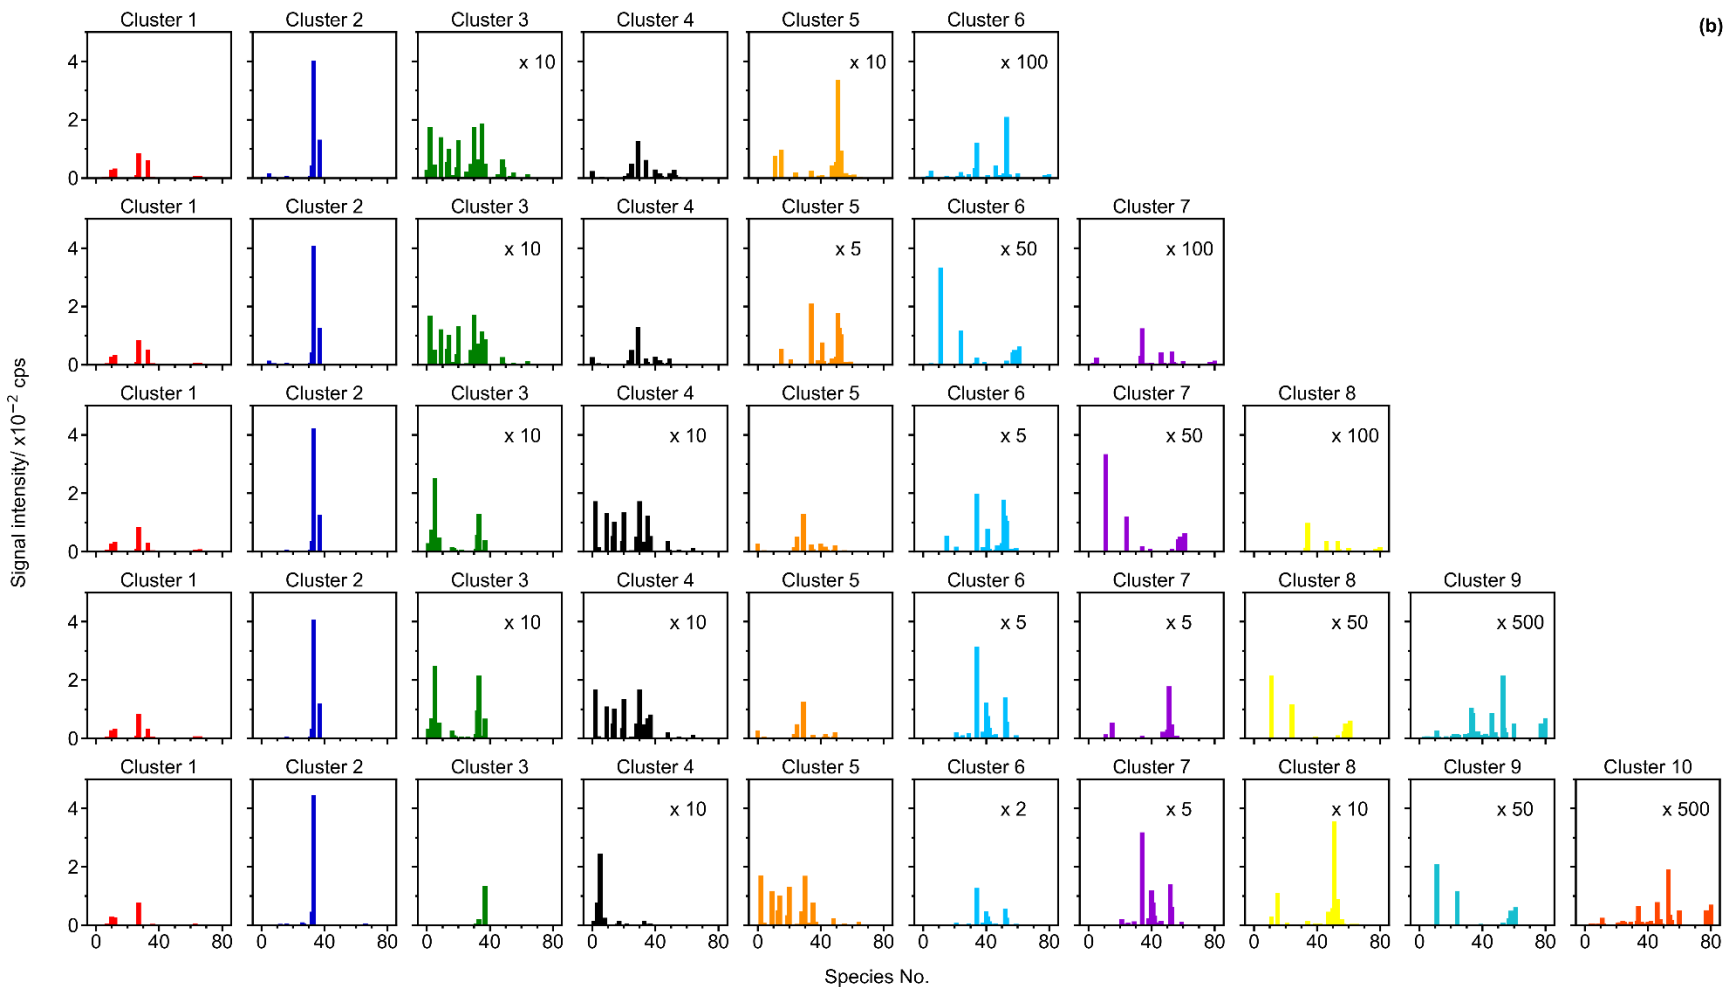

**Figure S4.** Fuzzy c-means clustering results of chamber data with 7-10 clusters. Time series (a) and profiles (b) of clusters for each solution. The cluster centers are shown as colored thick lines, and species with the membership degree larger than 0.5 to the cluster are illustrated as thin lines in gray. The species number in panel (b) corresponds to species listed in Fig. S7 (in order of molecular mass).

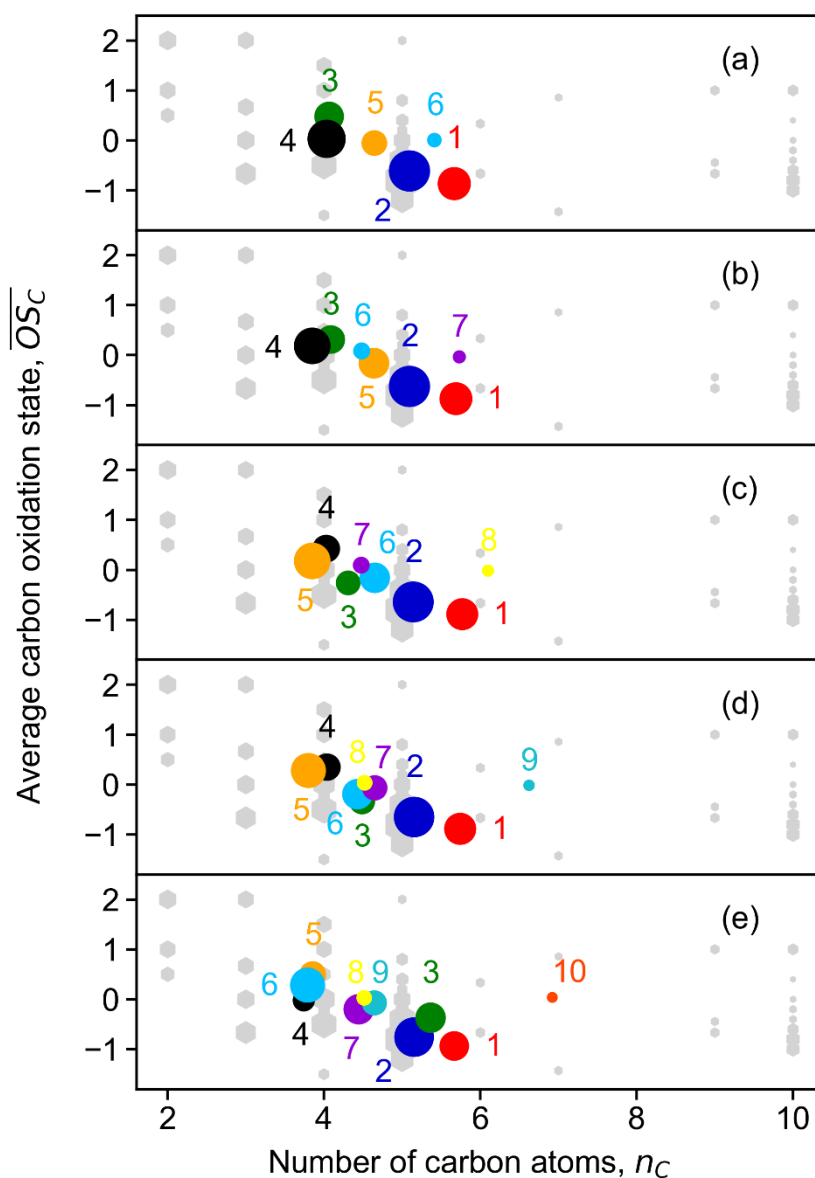

**Figure S5.** Average oxidation state ( $\overline{OS}_C$ ) of FCM clusters of chamber data as a function of number of carbon atoms ( $n_C$ ). Panel (a) to panel (e) show results for solutions with 6 to 10 clusters, respectively. Cluster centers are depicted by circles in different colors. The color scheme follows that in Fig. 4. The marker area of clusters is proportional to the sum of average signal intensity of all species in the cluster weighted by their membership degrees. Closed-shell products detected by Br- CIMS are shown as grey hexagons, and the marker area is proportional to the average intensity of species over the whole experiment.

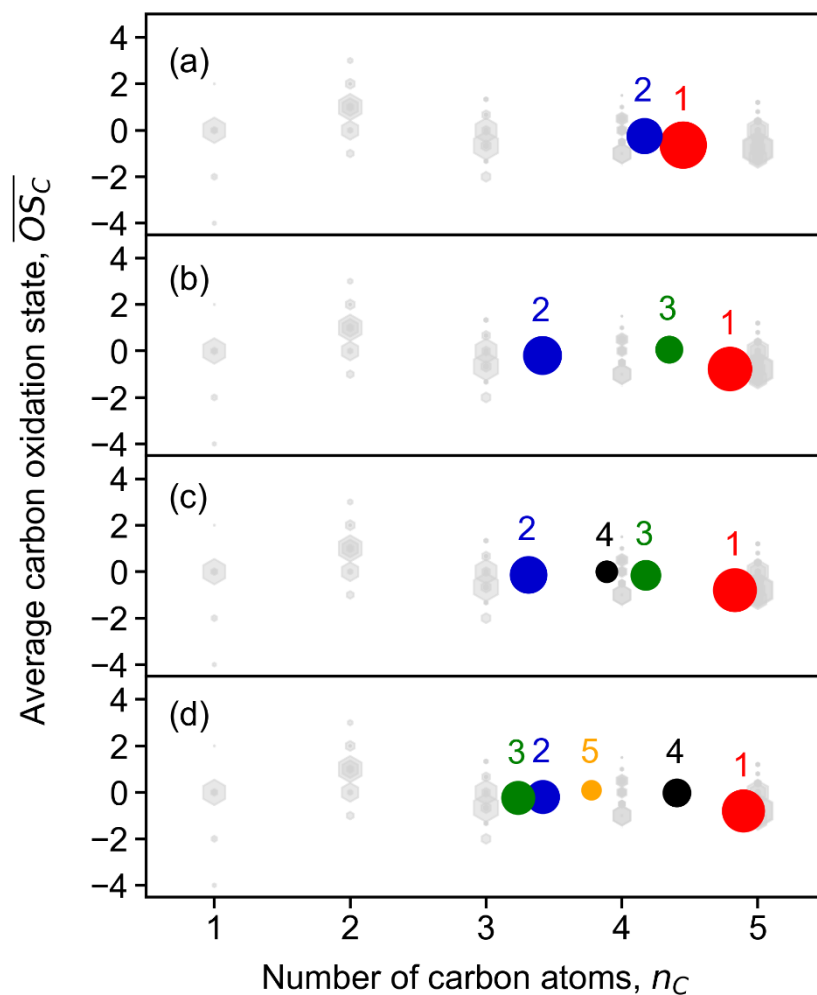

**Figure S6.** Average oxidation state ( $\overline{OS}_C$ ) of FCM clusters of model data as a function of number of carbon atoms ( $n_C$ ). Panel (a) to panel (d) show results for solutions with 2 to 5 clusters, respectively. Cluster centers are depicted by circles in different colors. The color scheme follows that in Fig. 4. The marker area of clusters is proportional to the sum of the average signal intensity of all species in the cluster weighted by their membership degrees. Closed-shell products detected by Br<sup>-</sup> CIMS are shown as grey hexagons, and the marker area is proportional to the average intensity of species over the whole experiment.



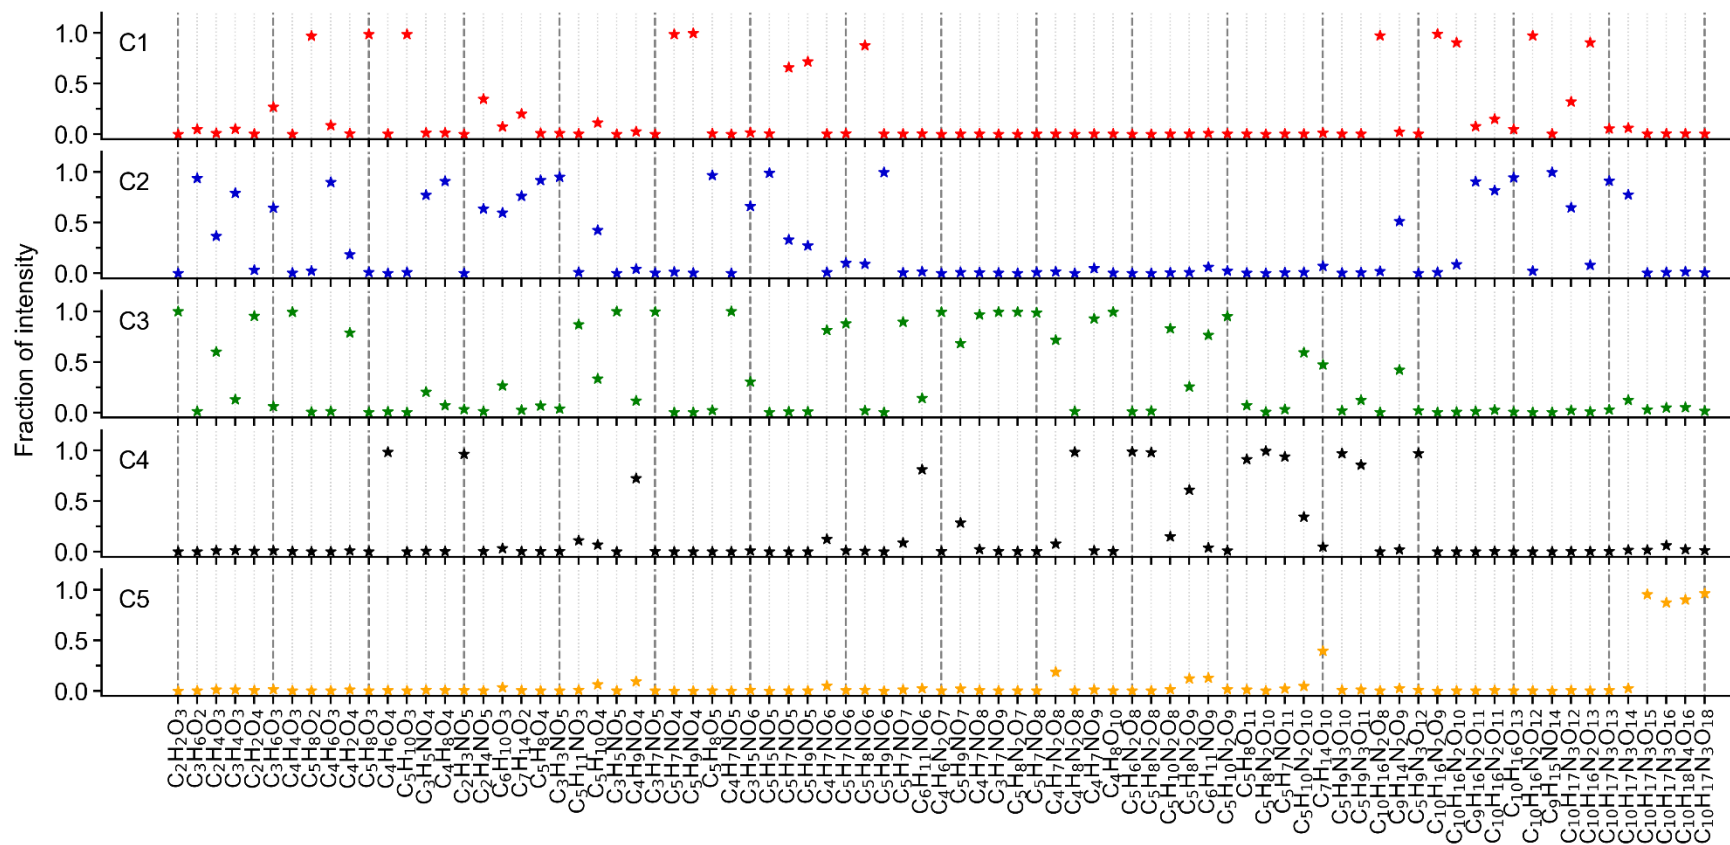

**Figure S7.** Cluster apportionment of species for the five-cluster solution. The sum of fractions of a compound in each cluster adds up to 1. Different clusters are distinguished by color, and the color scheme follows that in Fig. 4. Species are listed in the same order (in order of molecular mass) to those in Fig. 7.

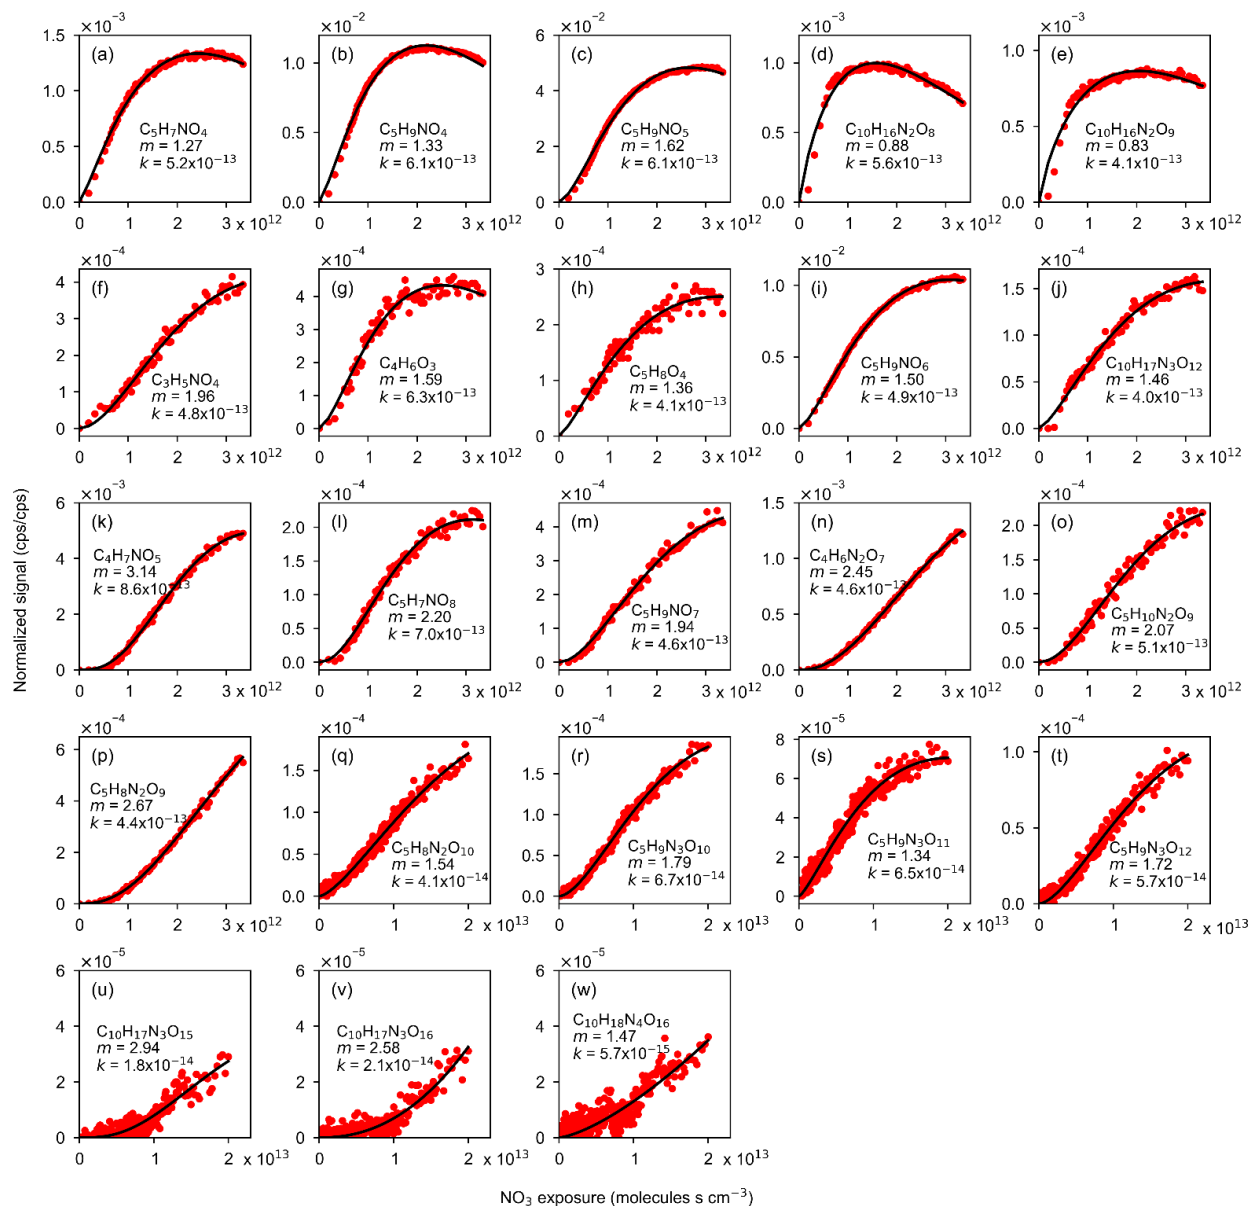

**Figure S8.** Representative species measured by  $\text{Br}^-$ -CIMS from isoprene +  $\text{NO}_3$  experiment (red) and the GKP fitting results (black).

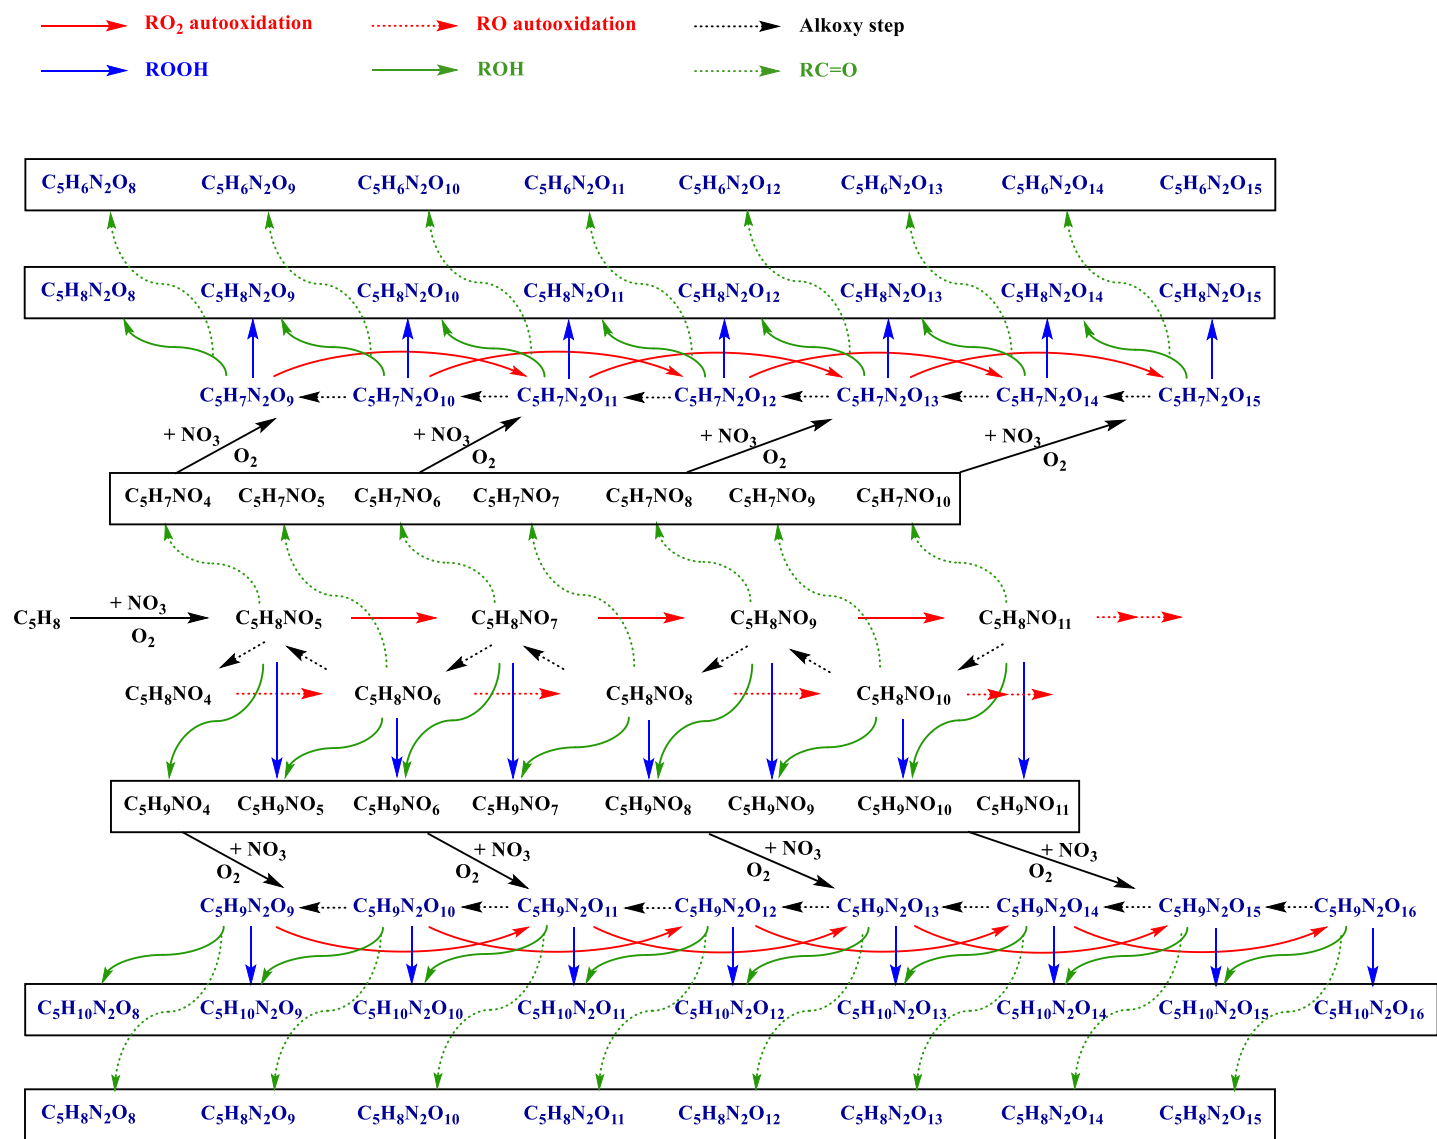

**Scheme S1.** General reaction scheme of isoprene oxidation by NO<sub>3</sub>. The first- and second-generation products are shown in black and blue, respectively. Closed-shell species are outlined in black boxes. Dimers are not shown in this scheme for simplicity.

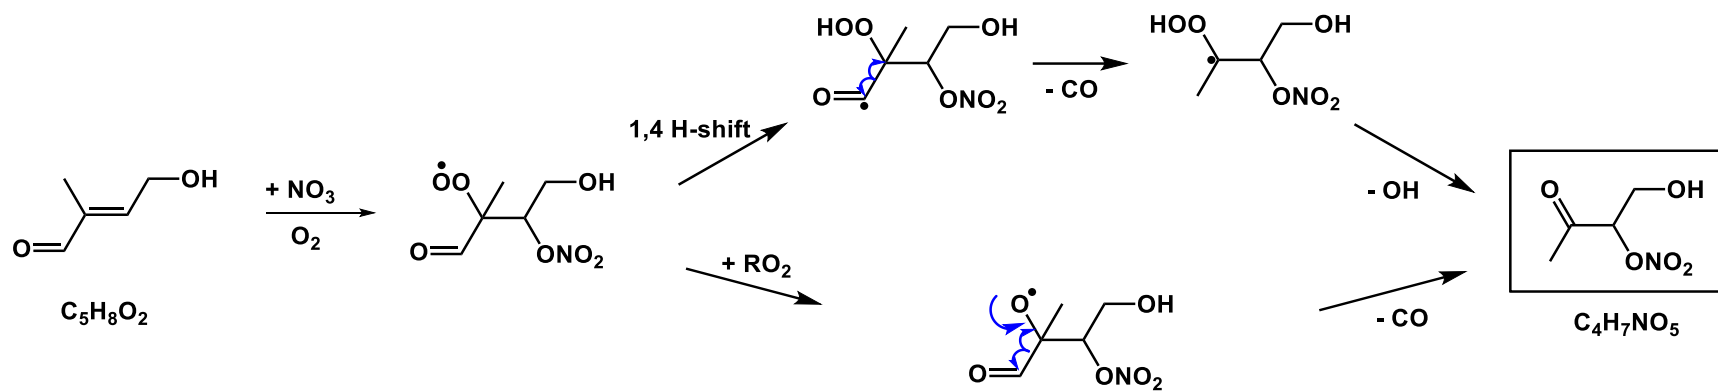

**Scheme S2.** Proposed formation mechanism of  $C_4H_7NO_5$  through further oxidation of the first-generation  $C_5$  carbonyl compound. Adapted from Wu et al. (2021).

## References

- Bouguessa, M. and Wang, S.-R.: A new efficient validity index for fuzzy clustering, Proceedings of 2004 International Conference on Machine Learning and Cybernetics (IEEE Cat. No. 04EX826), 1914-1919,
- Bouguessa, M., Wang, S., and Sun, H.: An objective approach to cluster validation, Pattern Recognition Letters, 27, 1419-1430, 10.1016/j.patrec.2006.01.015, 2006.
- Campello, R. J. G. B. and Hruschka, E. R.: A fuzzy extension of the silhouette width criterion for cluster analysis, Fuzzy Sets and Systems, 157, 2858-2875, 10.1016/j.fss.2006.07.006, 2006.
- Fukuyama, Y.: A new method of choosing the number of clusters for the fuzzy c-mean method, Proc. 5th Fuzzy Syst. Symp., 1989, 247-250.
- Kwon, S.-H.: Cluster validity index for fuzzy clustering, Electronics Letters, 34, 2176-2177, 1998.
- Rousseeuw, P. J.: Silhouettes: a graphical aid to the interpretation and validation of cluster analysis, Journal of computational and applied mathematics, 20, 53-65, 1987.
- Rawashdeh, M. and Ralescu, A. L.: Fuzzy Cluster Validity with Generalized Silhouettes, Midwest Artificial Intelligence and Cognitive Science Conference, 2012.
- Xie, X. L. and Beni, G.: A validity measure for fuzzy clustering, IEEE Transactions on Pattern Analysis & Machine Intelligence, 13, 841-847, 1991.
